# Supplementary figures and images for: Cross-neutralizing antibodies elicited by the Cervarix® human papillomavirus vaccine display a range of Alpha-9 inter-type specificities
Source: PubMed Central journal article supplement — Vaccine. 2014 Feb 26;32(10):1139–46. doi: 10.1016/j.vaccine.2014.01.008 (PMC3969227; doi:10.1016/j.vaccine.2014.01.008), 2014-02-26

Serum A

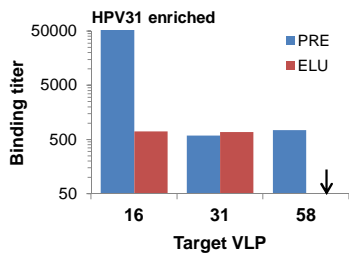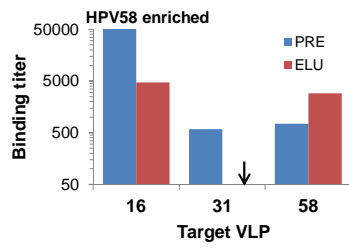

Serum B

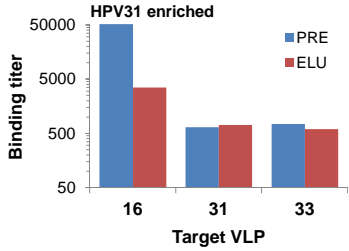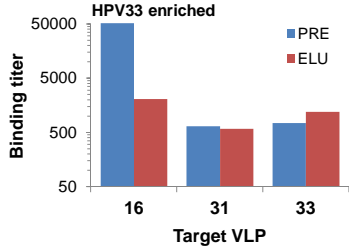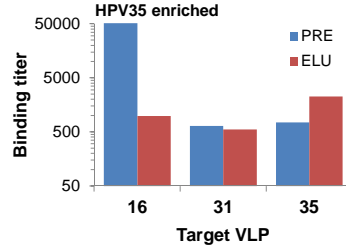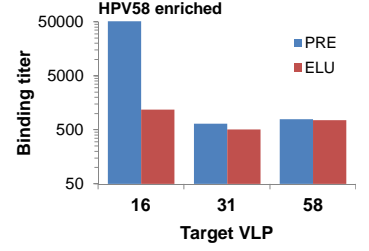

Serum C

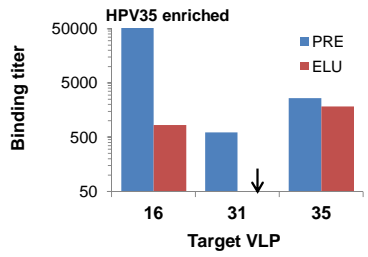

Serum D

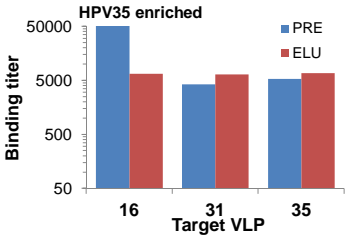

Serum E

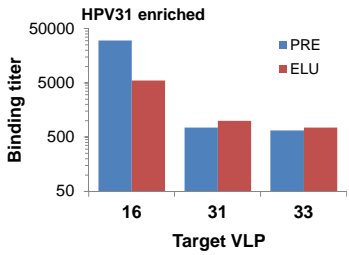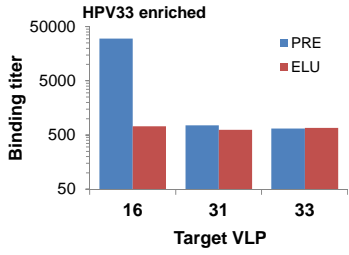

Serum F

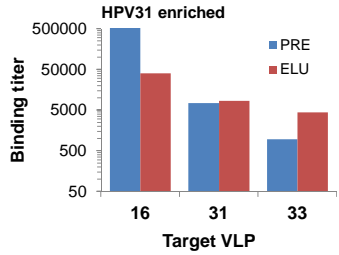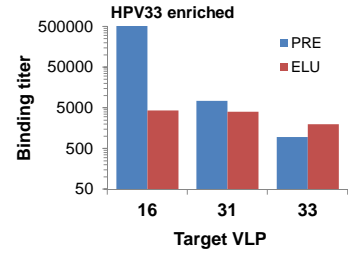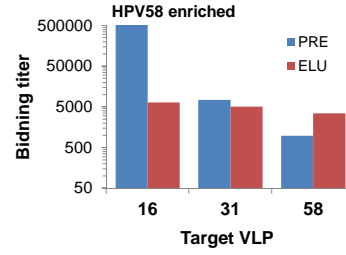

Supplement: mmc1.pdf [file mmc1.pdf]
